# Supplementary material
Source: MDPI journal article supplement (doi:10.3390/horticulturae12030355)
Supplement: s1 [file horticulturae-4163622-supplementary.pdf › horticulturae-4163622-supplementary.pdf]

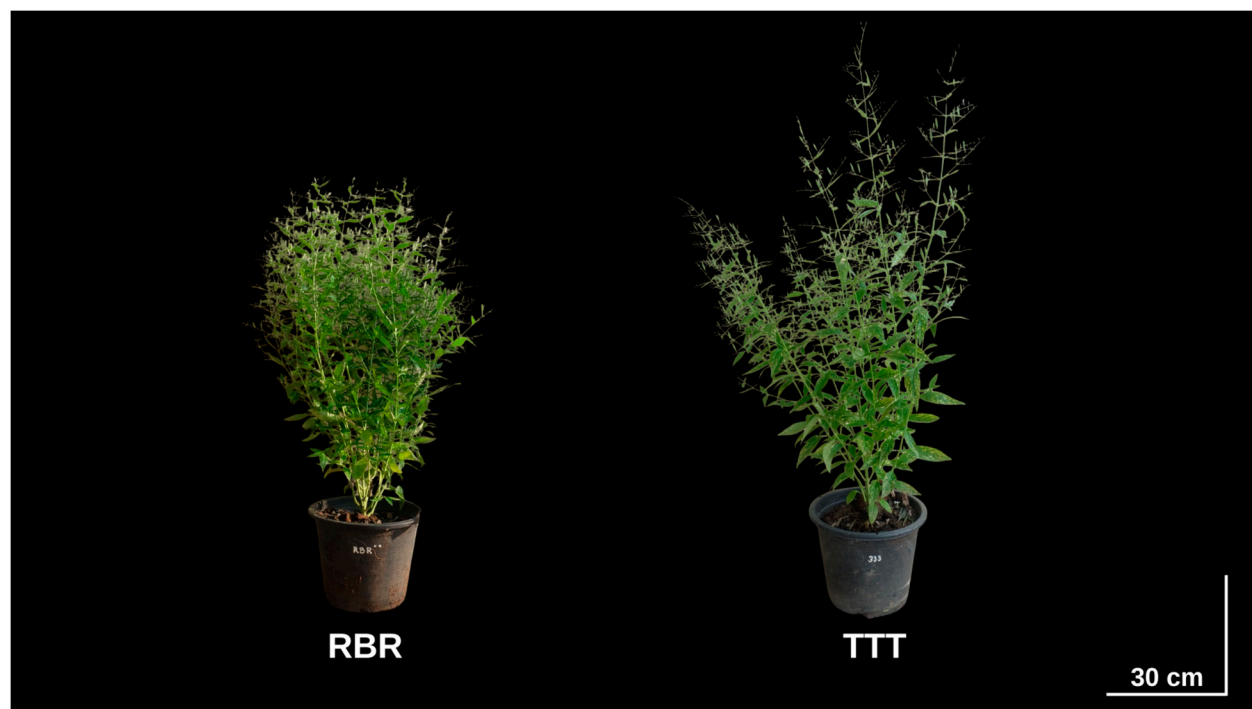

**Figure S1.** Morphological characteristics of two *Andrographis paniculata* cultivars (RBR and TTT) grown in pots under greenhouse conditions.

**Table S1.** Andrographolide content of two cultivars on different light spectrum ratio treatments. On AP1, AP4, AP6 and Total AP per plant DW. Values are represented as mean  $\pm$  SE (n=4). Different letters indicate significant difference between planting densities at  $p < 0.05$ .

| Cultivars | Light Treatment | Andrographolide content (mg/plant DW) |                   |                    |                       |
|-----------|-----------------|---------------------------------------|-------------------|--------------------|-----------------------|
|           |                 | AP1                                   | AP4               | AP6                | Total AP              |
| RBR       | White           | 125.36 $\pm$ 20.02abc                 | 9.41 $\pm$ 0.92a  | 40.31 $\pm$ 4.33a  | 175.08 $\pm$ 24.49abc |
|           | B10:G10R80      | 83.86 $\pm$ 10.18cd                   | 9.31 $\pm$ 0.90a  | 32.58 $\pm$ 2.71ab | 125.75 $\pm$ 12.83cd  |
|           | B20:G10:R70     | 52.53 $\pm$ 3.26d                     | 4.58 $\pm$ 0.50b  | 21.18 $\pm$ 1.37b  | 78.29 $\pm$ 4.72d     |
|           | B30:G10:R60     | 126.27 $\pm$ 8.54abc                  | 10.36 $\pm$ 0.85a | 42.68 $\pm$ 6.34a  | 179.30 $\pm$ 9.70abc  |
|           | B40:G10:R50     | 125.15 $\pm$ 10.76abc                 | 10.38 $\pm$ 1.47a | 35.64 $\pm$ 8.91ab | 171.17 $\pm$ 20.21abc |
|           | B50:G10:R40     | 100.20 $\pm$ 15.51bc                  | 7.73 $\pm$ 1.97ab | 31.21 $\pm$ 4.68ab | 139.14 $\pm$ 21.65bc  |
|           | B60:G10:R30     | 162.58 $\pm$ 14.25a                   | 11.68 $\pm$ 2.69a | 42.92 $\pm$ 1.61a  | 217.17 $\pm$ 17.87a   |
|           | B70:G10:R20     | 139.60 $\pm$ 21.19ab                  | 9.60 $\pm$ 1.46a  | 47.14 $\pm$ 9.48a  | 196.34 $\pm$ 29.91ab  |
| TTT       | White           | 102.54 $\pm$ 7.70b                    | 5.26 $\pm$ 0.48bc | 32.36 $\pm$ 3.38bc | 140.16 $\pm$ 11.48c   |
|           | B10:G10R80      | 106.57 $\pm$ 9.89b                    | 7.04 $\pm$ 0.91b  | 37.45 $\pm$ 3.37b  | 151.05 $\pm$ 9.03bc   |
|           | B20:G10:R70     | 67.70 $\pm$ 5.21c                     | 4.42 $\pm$ 0.35c  | 22.81 $\pm$ 1.25c  | 94.93 $\pm$ 6.64d     |
|           | B30:G10:R60     | 73.14 $\pm$ 3.39c                     | 4.21 $\pm$ 0.24c  | 22.76 $\pm$ 1.50c  | 100.11 $\pm$ 4.86d    |
|           | B40:G10:R50     | 106.07 $\pm$ 5.97b                    | 5.68 $\pm$ 0.51bc | 35.43 $\pm$ 2.04bc | 147.17 $\pm$ 7.95c    |
|           | B50:G10:R40     | 108.85 $\pm$ 10.58b                   | 4.88 $\pm$ 0.25c  | 32.43 $\pm$ 4.90bc | 146.16 $\pm$ 11.98c   |
|           | B60:G10:R30     | 165.39 $\pm$ 18.28a                   | 8.84 $\pm$ 0.71a  | 56.37 $\pm$ 7.19a  | 230.69 $\pm$ 23.07a   |
|           | B70:G10:R20     | 124.98 $\pm$ 7.35b                    | 6.84 $\pm$ 0.95b  | 53.82 $\pm$ 6.34a  | 185.63 $\pm$ 14.01b   |
